# Supplementary material for: A new concept for production of (3S,4R)-6-[(benzyloxycarbonyl)amino]-5,6-dideoxyhex-2-ulose, a precursor of d-fagomine
Source: Royal Society of Chemistry journal article supplement (doi:10.1039/c5ra14414k), 2015-01-01
Supplement: c5ra14414k1.pdf [file c5ra14414k1.pdf]

## Appendix

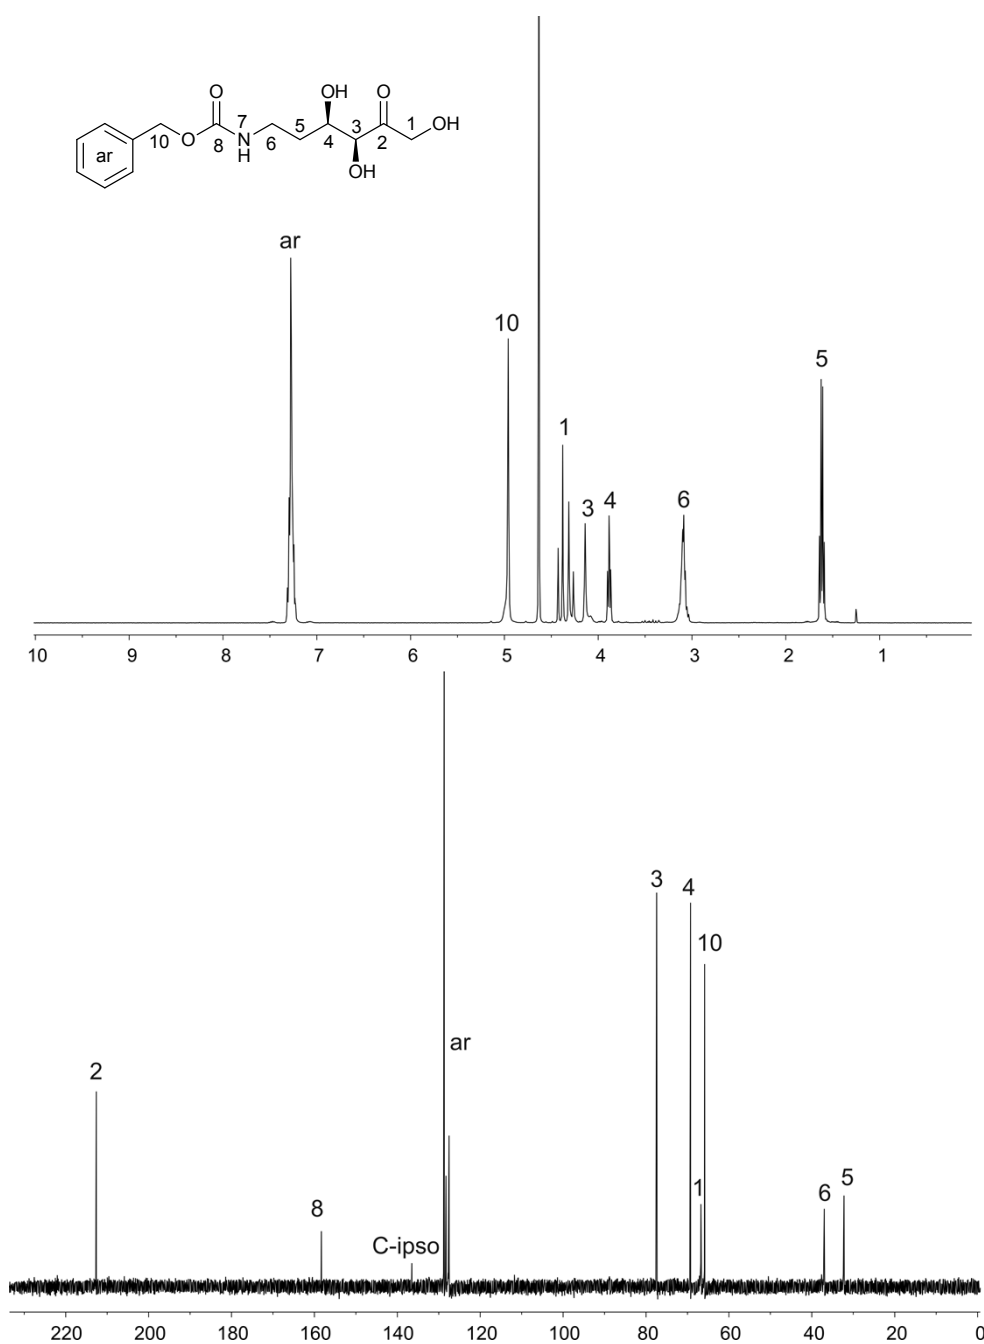

**Figure 1**  $^1\text{H}$  and  $^{13}\text{C}$  NMR of the purified aldol adduct from the cascade oxidation-aldol addition reaction of *N*-Cbz-3-aminopropanol and dihydroxyacetone catalyzed by FSA A129S.

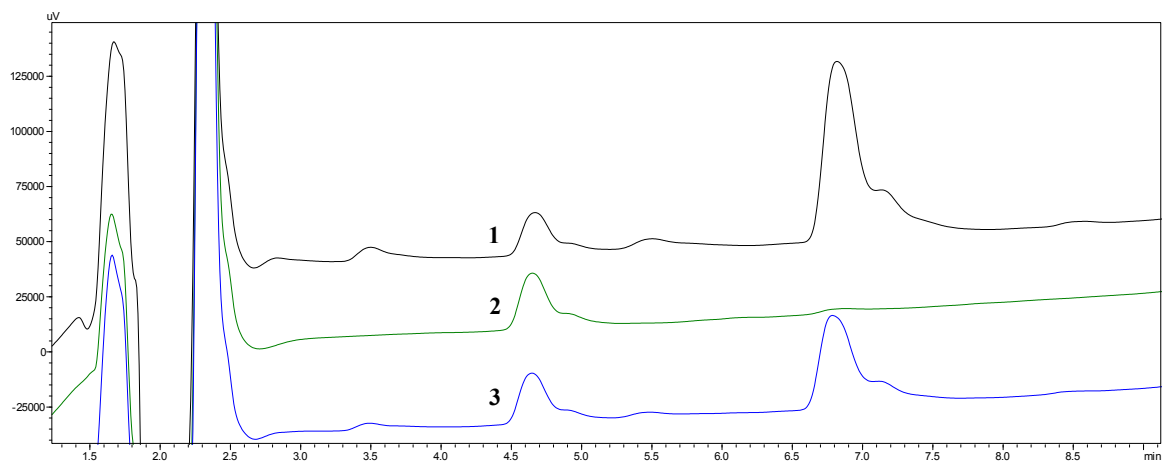

**Figure 2** HPLC chromatograms of **1.** sample from cascade reaction, **2.** aldol adduct standard, **3.** mixed sample of reaction sample and aldol adduct standard. Retention time of the aldol adduct is 4.6 min.

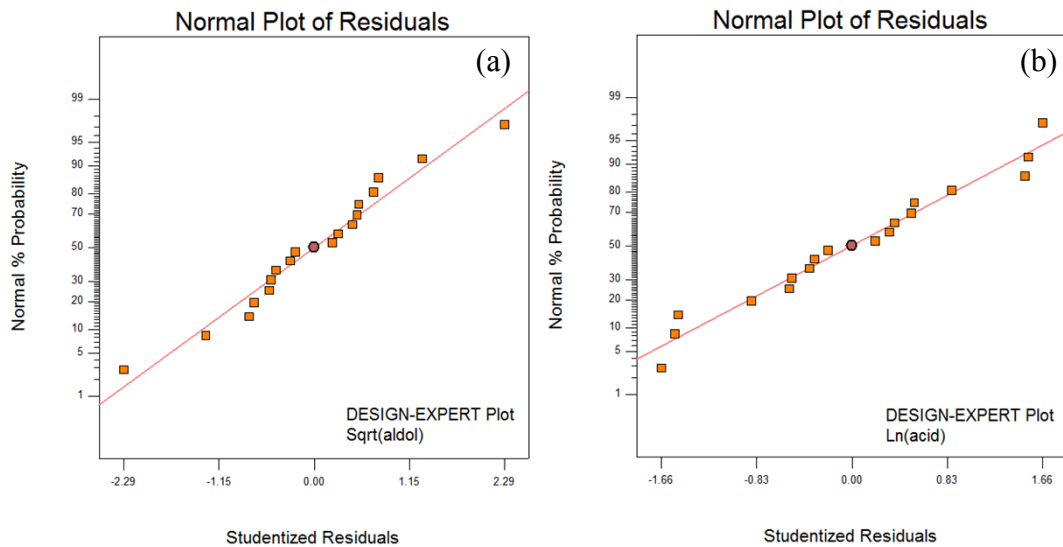

**Figure 3** Normal plots of residuals for the aldol adduct (a) and amino acid concentration (b).

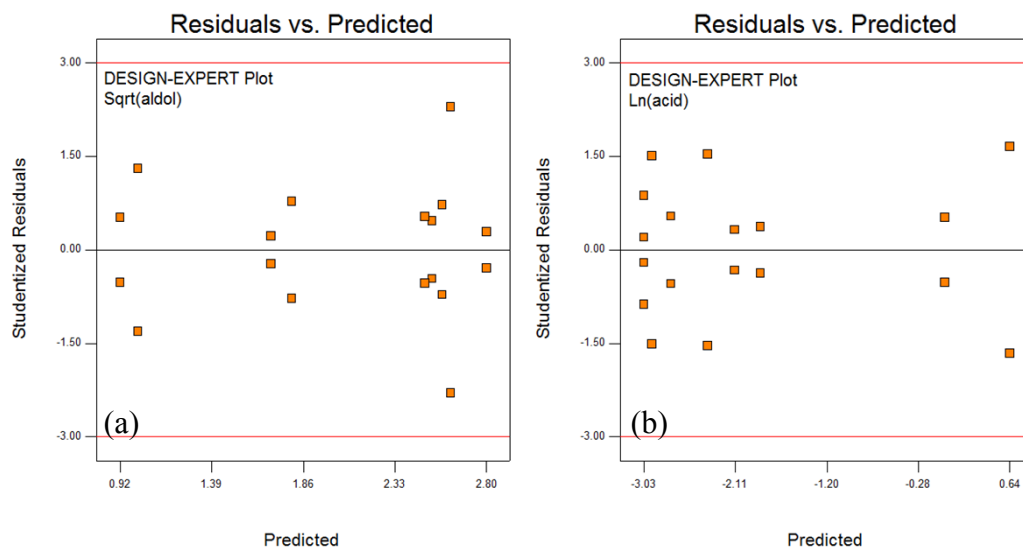

**Figure 4** Residuals vs predicted plot for the aldol adduct (a) and amino acid concentration (b).

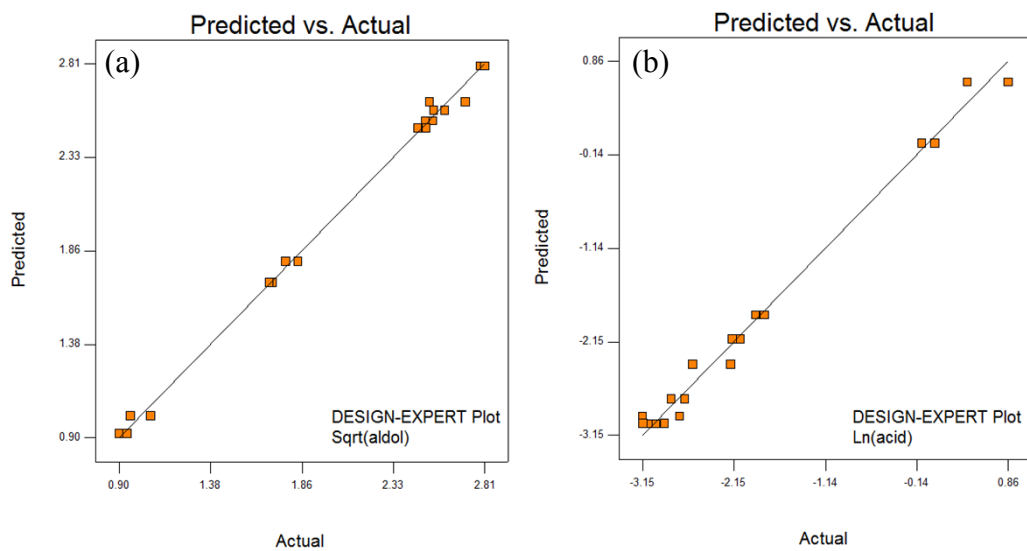

**Figure 5** Predicted vs actual plot for the aldol adduct (a) and amino acid concentration (b).

**Table 1** Optimal conditions for achieving maximum aldol adduct concentration suggested by the software.

| Name         | Goal             | Lower Limit | Upper Limit | Lower Weight | Upper Weight | Importance                     |
|--------------|------------------|-------------|-------------|--------------|--------------|--------------------------------|
| NAD          | is in range      | 0.1         | 1           | 1            | 1            | 3                              |
| FSA          | is in range      | 1           | 3           | 1            | 1            | 3                              |
| HLADH        | is in range      | 1           | 10          | 1            | 1            | 3                              |
| aldol adduct | maximize         | 0.81        | 7.91        | 1            | 1            | 5                              |
| Solutions    |                  |             |             |              |              |                                |
| Number       | NAD <sup>+</sup> | FSA         | HLADH       | aldol adduct | Desirability | $Y_{\text{aldol adduct}} / \%$ |
| 1            | 1.00             | 3.00        | 10.00       | 7.85         | 0.9939       | 78.49                          |
| 2            | 1.00             | 2.95        | 10.00       | 7.82         | 0.9915       | 78.23                          |
| 3            | 1.00             | 2.90        | 10.00       | 7.80         | 0.9893       | 77.99                          |
| 4            | 0.99             | 2.99        | 10.00       | 7.79         | 0.9883       | 77.89                          |
| 5            | 0.99             | 3.00        | 10.00       | 7.76         | 0.9855       | 77.58                          |
| 6            | 1.00             | 2.77        | 10.00       | 7.73         | 0.9827       | 77.29                          |
| 7            | 1.00             | 2.04        | 10.00       | 7.37         | 0.9481       | 73.65                          |
| 8            | 1.00             | 1.82        | 10.00       | 7.25         | 0.9373       | 72.54                          |
| 9            | 1.00             | 1.00        | 4.02        | 6.70         | 0.8830       | 67.05                          |

**Table 2** Optimal conditions for achieving minimum amino acid concentration suggested by the software.

| Name       | Goal             | Lower Limit | Upper Limit | Lower Weight | Upper Weight | Importance                   |
|------------|------------------|-------------|-------------|--------------|--------------|------------------------------|
| NAD        | is in range      | 0.1         | 1           | 1            | 1            | 3                            |
| FSA        | is in range      | 1           | 3           | 1            | 1            | 3                            |
| HLADH      | is in range      | 1           | 10          | 1            | 1            | 3                            |
| amino acid | minimize         | 0.04272     | 2.37326     | 1            | 1            | 5                            |
| Solutions  |                  |             |             |              |              |                              |
| Number     | NAD <sup>+</sup> | FSA         | HLADH       | amino acid   | Desirability | $Y_{\text{amino acid}} / \%$ |
| 1          | 0.10             | 1.15        | 10.00       | 0.04825      | 0.9697       | 0.4825                       |
| 2          | 0.10             | 1.00        | 9.96        | 0.04825      | 0.9697       | 0.4825                       |
| 3          | 0.10             | 1.46        | 10.00       | 0.04828      | 0.9696       | 0.4828                       |
| 4          | 0.10             | 1.58        | 10.00       | 0.04829      | 0.9695       | 0.4829                       |
| 5          | 0.10             | 1.07        | 9.85        | 0.04832      | 0.9694       | 0.4832                       |
| 6          | 0.10             | 1.90        | 10.00       | 0.04832      | 0.9694       | 0.4832                       |
| 7          | 0.10             | 2.31        | 10.00       | 0.04836      | 0.9692       | 0.4836                       |
| 8          | 0.10             | 2.51        | 10.00       | 0.04838      | 0.9691       | 0.4838                       |
| 9          | 0.10             | 1.00        | 5.39        | 0.05060      | 0.9579       | 0.5056                       |
| 10         | 0.10             | 1.00        | 4.10        | 0.05092      | 0.9563       | 0.5092                       |
